# Supplementary material for: Transcriptome meta-analysis of Kawasaki disease in humans and mice
Source: Front Pediatr. 2024 Sep 16;12:1423958. doi: 10.3389/fped.2024.1423958 (PMC11440715; doi:10.3389/fped.2024.1423958)
Supplement: Supplementary file 3 [file Table3.xlsx]

## Sheet: Sheet1
gene_name_human	gene_name_mouse	gene_symbol_human	gene_symbol_mouse	description	logFC_human	logCPM_human	adj.p-val_human	logFC_mouse	logCPM_mouse	adj.p-val_mouse
ENSG00000118785	ENSMUSG00000029304	SPP1	Spp1	secreted phosphoprotein 1 [Source:HGNC Symbol;Acc:HGNC:11255]	-0.959321	6.83738	0.411345	-8.76017	10.9409	1.92777e-145
ENSG00000102265	ENSMUSG00000001131	TIMP1	Timp1	TIMP metallopeptidase inhibitor 1 [Source:HGNC Symbol;Acc:HGNC:11820]	-0.0573356	7.61744	0.972988	-4.85966	9.63921	5.42568e-77
ENSG00000159216	ENSMUSG00000022952	RUNX1	Runx1	RUNX family transcription factor 1 [Source:HGNC Symbol;Acc:HGNC:10471]	-1.38124	7.94224	0.0895419	-4.12937	6.82856	3.58504e-57
ENSG00000134121	ENSMUSG00000030077	CHL1	Chl1	cell adhesion molecule L1 like [Source:HGNC Symbol;Acc:HGNC:1939]	0.738328	6.58046	0.483268	-4.75508	7.54003	2.79536e-56
ENSG00000162692	ENSMUSG00000027962	VCAM1	Vcam1	vascular cell adhesion molecule 1 [Source:HGNC Symbol;Acc:HGNC:12663]	-1.15251	6.09523	0.185301	-3.6385	8.90785	1.52442e-46
ENSG00000197629	ENSMUSG00000046805	MPEG1	Mpeg1	macrophage expressed 1 [Source:HGNC Symbol;Acc:HGNC:29619]	-1.68519	6.09104	0.0507103	-4.904	6.77963	1.92991e-44
ENSG00000131981	ENSMUSG00000050335	LGALS3	Lgals3	galectin 3 [Source:HGNC Symbol;Acc:HGNC:6563]	0.673748	6.65952	0.213163	-3.84696	7.11586	1.09477e-36
ENSG00000184557	ENSMUSG00000053113	SOCS3	Socs3	suppressor of cytokine signaling 3 [Source:HGNC Symbol;Acc:HGNC:19391]	-0.1078	6.87932	0.941214	-4.59476	7.09852	1.27341e-36
ENSG00000186340	ENSMUSG00000023885	THBS2	Thbs2	thrombospondin 2 [Source:HGNC Symbol;Acc:HGNC:11786]	-0.768288	10.1508	0.430248	-3.33696	8.05653	9.50972e-36
ENSG00000107562	ENSMUSG00000061353	CXCL12	Cxcl12	C-X-C motif chemokine ligand 12 [Source:HGNC Symbol;Acc:HGNC:10672]	-0.449906	8.30787	0.604808	-3.08858	9.7939	2.12925e-35
ENSG00000148154	ENSMUSG00000028381	UGCG	Ugcg	UDP-glucose ceramide glucosyltransferase [Source:HGNC Symbol;Acc:HGNC:12524]	-0.533387	8.30547	0.531466	-2.42509	6.99233	8.07687e-34
ENSG00000198604	ENSMUSG00000035021	BAZ1A	Baz1a	bromodomain adjacent to zinc finger domain 1A [Source:HGNC Symbol;Acc:HGNC:960]	-0.62845	7.20035	0.307567	-2.57728	7.267	1.2172e-32
ENSG00000139329	ENSMUSG00000036446	LUM	Lum	lumican [Source:HGNC Symbol;Acc:HGNC:6724]	-1.72703	9.03798	0.0667616	-2.51716	10.0789	3.98864e-31
ENSG00000171223	ENSMUSG00000052837	JUNB	Junb	JunB proto-oncogene, AP-1 transcription factor subunit [Source:HGNC Symbol;Acc:HGNC:6205]	-0.0565977	6.9407	0.971214	-3.39325	7.38514	5.56982e-31
ENSG00000185215	ENSMUSG00000021281	TNFAIP2	Tnfaip2	TNF alpha induced protein 2 [Source:HGNC Symbol;Acc:HGNC:11895]	0.713212	6.65712	0.365208	-2.9347	7.25666	1.43977e-30
ENSG00000100600	ENSMUSG00000021190	LGMN	Lgmn	legumain [Source:HGNC Symbol;Acc:HGNC:9472]	-0.390525	6.57496	0.639537	-2.20008	7.84913	7.17451e-30
ENSG00000046653	ENSMUSG00000031342	GPM6B	Gpm6b	glycoprotein M6B [Source:HGNC Symbol;Acc:HGNC:4461]	0.245909	6.61612	0.788963	-2.48191	7.28084	2.29695e-29
ENSG00000026508	ENSMUSG00000005087	CD44	Cd44	CD44 molecule (Indian blood group) [Source:HGNC Symbol;Acc:HGNC:1681]	-0.90642	9.16817	0.227159	-2.47519	8.27634	1.39244e-27
ENSG00000134769	ENSMUSG00000024302	DTNA	Dtna	dystrobrevin alpha [Source:HGNC Symbol;Acc:HGNC:3057]	1.52112	6.82267	0.0559624	2.55861	7.03666	6.35239e-27
ENSG00000104332	ENSMUSG00000031548	SFRP1	Sfrp1	secreted frizzled related protein 1 [Source:HGNC Symbol;Acc:HGNC:10776]	0.827562	6.85103	0.464042	-3.75327	9.49623	7.88055e-27
ENSG00000154553	ENSMUSG00000031636	PDLIM3	Pdlim3	PDZ and LIM domain 3 [Source:HGNC Symbol;Acc:HGNC:20767]	-0.271421	9.10477	0.807946	2.85982	6.83579	1.52432e-26
ENSG00000106034	ENSMUSG00000062980	CPED1	Cped1	cadherin like and PC-esterase domain containing 1 [Source:HGNC Symbol;Acc:HGNC:26159]	-0.369759	6.31427	0.777252	2.01428	8.65027	4.56361e-24
ENSG00000153310	ENSMUSG00000022378	FAM49B	Fam49b	CYFIP related Rac1 interactor B [Source:HGNC Symbol;Acc:HGNC:25216]	-0.838246	7.08519	0.180764	-2.60397	7.09333	2.66858e-23
ENSG00000154380	ENSMUSG00000022995	ENAH	Enah	ENAH actin regulator [Source:HGNC Symbol;Acc:HGNC:18271]	0.39729	9.21222	0.61114	2.08308	9.41379	5.98281e-23
ENSG00000131747	ENSMUSG00000020914	TOP2A	Top2a	DNA topoisomerase II alpha [Source:HGNC Symbol;Acc:HGNC:11989]	-1.53707	5.915	0.193007	-2.5943	6.41463	1.12326e-22
ENSG00000122367	ENSMUSG00000021798	LDB3	Ldb3	LIM domain binding 3 [Source:HGNC Symbol;Acc:HGNC:15710]	1.40269	9.21943	0.340074	2.38161	7.65505	1.16187e-22
ENSG00000157227	ENSMUSG00000000957	MMP14	Mmp14	matrix metallopeptidase 14 [Source:HGNC Symbol;Acc:HGNC:7160]	-0.236011	6.46464	0.804908	-2.46691	9.65027	1.82922e-22
ENSG00000077238	ENSMUSG00000030748	IL4R	Il4ra	interleukin 4 receptor [Source:HGNC Symbol;Acc:HGNC:6015]	0.274264	6.72807	0.737678	-3.00827	6.89434	3.4559e-22
ENSG00000172403	ENSMUSG00000050315	SYNPO2	Synpo2	synaptopodin 2 [Source:HGNC Symbol;Acc:HGNC:17732]	0.0550317	9.15458	0.961805	2.61705	8.69397	8.83189e-22
ENSG00000130176	ENSMUSG00000001349	CNN1	Cnn1	calponin 1 [Source:HGNC Symbol;Acc:HGNC:2155]	1.5477	5.50718	0.0643895	2.5216	8.89574	9.55248e-22
ENSG00000132334	ENSMUSG00000041836	PTPRE	Ptpre	protein tyrosine phosphatase receptor type E [Source:HGNC Symbol;Acc:HGNC:9669]	0.0752294	6.9765	0.94661	-2.72693	6.43353	1.10904e-21
ENSG00000196396	ENSMUSG00000027540	PTPN1	Ptpn1	protein tyrosine phosphatase non-receptor type 1 [Source:HGNC Symbol;Acc:HGNC:9642]	0.287081	6.42604	0.761479	-1.72608	7.57657	4.56307e-21
ENSG00000090006	ENSMUSG00000040488	LTBP4	Ltbp4	latent transforming growth factor beta binding protein 4 [Source:HGNC Symbol;Acc:HGNC:6717]	0.440065	6.80909	0.766795	1.77499	8.22244	1.70234e-20
ENSG00000163681	ENSMUSG00000021870	SLMAP	Slmap	sarcolemma associated protein [Source:HGNC Symbol;Acc:HGNC:16643]	0.514554	9.26037	0.460095	1.84871	7.62581	1.81896e-20
ENSG00000105971	ENSMUSG00000000058	CAV2	Cav2	caveolin 2 [Source:HGNC Symbol;Acc:HGNC:1528]	0.90652	7.94288	0.0801202	1.73274	7.03403	2.3206e-20
ENSG00000162616	ENSMUSG00000028035	DNAJB4	Dnajb4	DnaJ heat shock protein family (Hsp40) member B4 [Source:HGNC Symbol;Acc:HGNC:14886]	0.235677	6.90274	0.760831	1.55446	7.73761	2.37834e-20
ENSG00000159176	ENSMUSG00000026421	CSRP1	Csrp1	cysteine and glycine rich protein 1 [Source:HGNC Symbol;Acc:HGNC:2469]	0.0620548	8.09234	0.948963	1.75362	7.71535	3.27274e-20
ENSG00000131016	ENSMUSG00000038587	AKAP12	Akap12	A-kinase anchoring protein 12 [Source:HGNC Symbol;Acc:HGNC:370]	0.368443	10.1839	0.733348	1.86392	7.20574	5.06828e-20
ENSG00000157110	ENSMUSG00000031586	RBPMS	Rbpms	RNA binding protein, mRNA processing factor [Source:HGNC Symbol;Acc:HGNC:19097]	0.636464	8.46071	0.278902	1.84533	7.64203	2.3386e-19
ENSG00000125730	ENSMUSG00000024164	C3	C3	complement C3 [Source:HGNC Symbol;Acc:HGNC:1318]	0.927487	9.65568	0.202988	-2.42539	10.3198	2.62422e-19
ENSG00000147852	ENSMUSG00000024924	VLDLR	Vldlr	very low density lipoprotein receptor [Source:HGNC Symbol;Acc:HGNC:12698]	1.52089	6.09121	0.0513851	2.46335	7.35899	1.20887e-18
ENSG00000119314	ENSMUSG00000028382	PTBP3	Ptbp3	polypyrimidine tract binding protein 3 [Source:HGNC Symbol;Acc:HGNC:10253]	-0.434993	8.74768	0.489312	-1.38388	8.29195	3.32314e-18
ENSG00000137033	ENSMUSG00000024810	IL33	Il33	interleukin 33 [Source:HGNC Symbol;Acc:HGNC:16028]	0.901903	8.1865	0.149288	-3.24518	7.77408	4.51087e-18
ENSG00000144283	ENSMUSG00000026991	PKP4	Pkp4	plakophilin 4 [Source:HGNC Symbol;Acc:HGNC:9026]	0.772168	6.39424	0.23797	1.8852	7.97335	5.06366e-18
ENSG00000133392	ENSMUSG00000018830	MYH11	Myh11	myosin heavy chain 11 [Source:HGNC Symbol;Acc:HGNC:7569]	-0.369698	9.38924	0.800466	2.64457	10.5441	6.47236e-18
ENSG00000152952	ENSMUSG00000032374	PLOD2	Plod2	procollagen-lysine,2-oxoglutarate 5-dioxygenase 2 [Source:HGNC Symbol;Acc:HGNC:9082]	-0.885286	8.92447	0.318054	-1.53937	7.87763	6.93879e-18
ENSG00000183963	ENSMUSG00000020439	SMTN	Smtn	smoothelin [Source:HGNC Symbol;Acc:HGNC:11126]	0.669871	6.49973	0.329324	1.87273	8.58797	8.84886e-18
ENSG00000106211	ENSMUSG00000004951	HSPB1	Hspb1	heat shock protein family B (small) member 1 [Source:HGNC Symbol;Acc:HGNC:5246]	1.51866	6.07201	0.0588126	2.42929	8.16114	8.91108e-18
ENSG00000162704	ENSMUSG00000008475	ARPC5	Arpc5	actin related protein 2/3 complex subunit 5 [Source:HGNC Symbol;Acc:HGNC:708]	-0.555317	7.64465	0.368564	-1.44359	7.72915	1.58575e-17
ENSG00000101347	ENSMUSG00000027639	SAMHD1	Samhd1	SAM and HD domain containing deoxynucleoside triphosphate triphosphohydrolase 1 [Source:HGNC Symbol;Acc:HGNC:15925]	-0.489429	8.75853	0.478515	-1.78745	7.98749	2.71367e-17
ENSG00000111666	ENSMUSG00000060002	CHPT1	Chpt1	choline phosphotransferase 1 [Source:HGNC Symbol;Acc:HGNC:17852]	0.525411	6.42985	0.478515	1.97727	7.98478	3.80447e-17
ENSG00000138061	ENSMUSG00000024087	CYP1B1	Cyp1b1	cytochrome P450 family 1 subfamily B member 1 [Source:HGNC Symbol;Acc:HGNC:2597]	-0.616753	9.44439	0.559092	-2.16099	8.19651	4.53285e-17
ENSG00000204388	ENSMUSG00000090877	HSPA1B	Hspa1b	heat shock protein family A (Hsp70) member 1B [Source:HGNC Symbol;Acc:HGNC:5233]	-1.22075	6.36989	0.242519	2.90851	6.79719	4.74992e-17
ENSG00000204389	ENSMUSG00000090877	HSPA1A	Hspa1b	heat shock protein family A (Hsp70) member 1A [Source:HGNC Symbol;Acc:HGNC:5232]	-0.884212	6.30071	0.436214	2.90851	6.79719	4.74992e-17
ENSG00000072952	ENSMUSG00000005611	MRVI1	Mrvi1	inositol 1,4,5-triphosphate receptor associated 1 [Source:HGNC Symbol;Acc:HGNC:7237]	-0.802243	6.54384	0.396127	1.83178	7.16406	5.51085e-17
ENSG00000131471	ENSMUSG00000019326	AOC3	Aoc3	amine oxidase copper containing 3 [Source:HGNC Symbol;Acc:HGNC:550]	0.656712	6.83535	0.460095	1.99084	7.70322	6.5651e-17
ENSG00000162614	ENSMUSG00000039103	NEXN	Nexn	nexilin F-actin binding protein [Source:HGNC Symbol;Acc:HGNC:29557]	1.28098	8.52449	0.145085	1.84536	9.45172	8.97363e-17
ENSG00000062716	ENSMUSG00000018171	VMP1	Vmp1	vacuole membrane protein 1 [Source:HGNC Symbol;Acc:HGNC:29559]	-0.841317	8.87517	0.177961	-2.20482	8.0795	1.65281e-16
ENSG00000145623	ENSMUSG00000022146	OSMR	Osmr	oncostatin M receptor [Source:HGNC Symbol;Acc:HGNC:8507]	0.597835	8.17428	0.349015	-1.97999	6.4971	2.46544e-16
ENSG00000077157	ENSMUSG00000073557	PPP1R12B	Ppp1r12b	protein phosphatase 1 regulatory subunit 12B [Source:HGNC Symbol;Acc:HGNC:7619]	0.357313	10.0705	0.748562	1.94806	8.6201	4.7892e-16
ENSG00000075223	ENSMUSG00000028780	SEMA3C	Sema3c	semaphorin 3C [Source:HGNC Symbol;Acc:HGNC:10725]	-0.863685	7.0443	0.242709	2.5254	7.36904	4.87326e-16
ENSG00000170017	ENSMUSG00000022636	ALCAM	Alcam	activated leukocyte cell adhesion molecule [Source:HGNC Symbol;Acc:HGNC:400]	-0.207935	7.25982	0.885838	-1.71453	7.3171	5.5359e-16
ENSG00000167460	ENSMUSG00000031799	TPM4	Tpm4	tropomyosin 4 [Source:HGNC Symbol;Acc:HGNC:12013]	-0.36888	9.80946	0.622431	-1.5096	8.56792	9.59403e-16
ENSG00000204103	ENSMUSG00000074622	MAFB	Mafb	MAF bZIP transcription factor B [Source:HGNC Symbol;Acc:HGNC:6408]	-1.29522	6.01343	0.083554	-1.96081	6.6081	1.13532e-15
ENSG00000172348	ENSMUSG00000039601	RCAN2	Rcan2	regulator of calcineurin 2 [Source:HGNC Symbol;Acc:HGNC:3041]	0.258082	6.96035	0.886318	2.24435	7.43161	1.36016e-15
ENSG00000100644	ENSMUSG00000021109	HIF1A	Hif1a	hypoxia inducible factor 1 subunit alpha [Source:HGNC Symbol;Acc:HGNC:4910]	-0.528279	10.0683	0.573337	-1.6684	9.01119	1.37277e-15
ENSG00000148180	ENSMUSG00000026879	GSN	Gsn	gelsolin [Source:HGNC Symbol;Acc:HGNC:4620]	0.406173	9.35049	0.726348	2.27376	10.8177	1.40246e-15
ENSG00000101605	ENSMUSG00000024049	MYOM1	Myom1	myomesin 1 [Source:HGNC Symbol;Acc:HGNC:7613]	2.51327	9.22082	0.0696531	2.2765	8.53708	2.13994e-15
ENSG00000003989	ENSMUSG00000031596	SLC7A2	Slc7a2	solute carrier family 7 member 2 [Source:HGNC Symbol;Acc:HGNC:11060]	0.533898	7.59387	0.429326	-1.79216	8.60508	5.83834e-15
ENSG00000134107	ENSMUSG00000030103	BHLHE40	Bhlhe40	basic helix-loop-helix family member e40 [Source:HGNC Symbol;Acc:HGNC:1046]	-0.494116	7.44682	0.53973	-2.22451	6.42759	5.92531e-15
ENSG00000133083	ENSMUSG00000027797	DCLK1	Dclk1	doublecortin like kinase 1 [Source:HGNC Symbol;Acc:HGNC:2700]	0.196678	7.62059	0.88136	-1.81222	7.66033	6.01056e-15
ENSG00000140416	ENSMUSG00000032366	TPM1	Tpm1	tropomyosin 1 [Source:HGNC Symbol;Acc:HGNC:12010]	1.42076	10.5379	0.0894935	2.00665	10.9799	6.14271e-15
ENSG00000094963	ENSMUSG00000040170	FMO2	Fmo2	flavin containing dimethylaniline monoxygenase 2 [Source:HGNC Symbol;Acc:HGNC:3770]	0.0276996	7.51054	0.986229	2.52272	9.73614	6.14271e-15
ENSG00000065534	ENSMUSG00000022836	MYLK	Mylk	myosin light chain kinase [Source:HGNC Symbol;Acc:HGNC:7590]	-0.830969	8.2856	0.255548	1.72747	10.8106	7.27142e-15
ENSG00000081052	ENSMUSG00000067158	COL4A4	Col4a4	collagen type IV alpha 4 chain [Source:HGNC Symbol;Acc:HGNC:2206]	0.919415	8.09614	0.46573	3.20683	7.09079	9.27009e-15
ENSG00000153012	ENSMUSG00000039252	LGI2	Lgi2	leucine rich repeat LGI family member 2 [Source:HGNC Symbol;Acc:HGNC:18710]	-0.371168	5.24162	0.808635	-1.75783	7.69728	9.30247e-15
ENSG00000105974	ENSMUSG00000007655	CAV1	Cav1	caveolin 1 [Source:HGNC Symbol;Acc:HGNC:1527]	0.742221	8.56003	0.258625	1.5	8.9758	1.00797e-14
ENSG00000166819	ENSMUSG00000030546	PLIN1	Plin1	perilipin 1 [Source:HGNC Symbol;Acc:HGNC:9076]	1.2134	6.68702	0.48118	2.5283	7.08952	1.27093e-14
ENSG00000144802	ENSMUSG00000035356	NFKBIZ	Nfkbiz	NFKB inhibitor zeta [Source:HGNC Symbol;Acc:HGNC:29805]	-0.937653	7.22836	0.0564442	-2.03858	6.3644	2.02924e-14
ENSG00000064042	ENSMUSG00000037736	LIMCH1	Limch1	LIM and calponin homology domains 1 [Source:HGNC Symbol;Acc:HGNC:29191]	0.441446	7.91692	0.618435	2.10934	7.97869	2.03997e-14
ENSG00000197321	ENSMUSG00000024236	SVIL	Svil	supervillin [Source:HGNC Symbol;Acc:HGNC:11480]	0.775817	8.97584	0.368238	1.2479	8.04897	2.16065e-14
ENSG00000170962	ENSMUSG00000032006	PDGFD	Pdgfd	platelet derived growth factor D [Source:HGNC Symbol;Acc:HGNC:30620]	0.752003	6.8578	0.229169	1.92241	6.26309	2.55807e-14
ENSG00000140945	ENSMUSG00000031841	CDH13	Cdh13	cadherin 13 [Source:HGNC Symbol;Acc:HGNC:1753]	-0.0540542	6.74418	0.972988	1.44563	8.92644	2.89378e-14
ENSG00000133687	ENSMUSG00000030306	TMTC1	Tmtc1	transmembrane O-mannosyltransferase targeting cadherins 1 [Source:HGNC Symbol;Acc:HGNC:24099]	0.636583	7.85606	0.307347	2.03186	6.36207	5.62306e-14
ENSG00000164116	ENSMUSG00000033910	GUCY1A3	Gucy1a1	guanylate cyclase 1 soluble subunit alpha 1 [Source:HGNC Symbol;Acc:HGNC:4685]	-0.646709	6.89962	0.434392	1.40046	7.90894	7.22622e-14
ENSG00000137801	ENSMUSG00000040152	THBS1	Thbs1	thrombospondin 1 [Source:HGNC Symbol;Acc:HGNC:11785]	0.712776	11.7071	0.383046	-3.17842	7.67554	9.11441e-14
ENSG00000120694	ENSMUSG00000029657	HSPH1	Hsph1	heat shock protein family H (Hsp110) member 1 [Source:HGNC Symbol;Acc:HGNC:16969]	-0.0433563	7.21009	0.973968	1.80451	7.26376	1.13125e-13
ENSG00000144668	ENSMUSG00000039115	ITGA9	Itga9	integrin subunit alpha 9 [Source:HGNC Symbol;Acc:HGNC:6145]	1.32393	7.12792	0.0513851	1.8179	8.5496	1.16479e-13
ENSG00000073910	ENSMUSG00000056602	FRY	Fry	FRY microtubule binding protein [Source:HGNC Symbol;Acc:HGNC:20367]	0.54634	8.05473	0.570021	1.50479	7.23258	2.29556e-13
ENSG00000111145	ENSMUSG00000008398	ELK3	Elk3	ETS transcription factor ELK3 [Source:HGNC Symbol;Acc:HGNC:3325]	-0.436627	8.04631	0.52103	-1.72517	6.66048	2.35605e-13
ENSG00000154734	ENSMUSG00000022893	ADAMTS1	Adamts1	ADAM metallopeptidase with thrombospondin type 1 motif 1 [Source:HGNC Symbol;Acc:HGNC:217]	0.841353	9.54181	0.234431	1.36642	7.66384	2.39182e-13
ENSG00000005020	ENSMUSG00000059182	SKAP2	Skap2	src kinase associated phosphoprotein 2 [Source:HGNC Symbol;Acc:HGNC:15687]	-1.45998	6.10602	0.0512164	-1.45698	7.13638	3.44197e-13
ENSG00000254087	ENSMUSG00000042228	LYN	Lyn	LYN proto-oncogene, Src family tyrosine kinase [Source:HGNC Symbol;Acc:HGNC:6735]	-0.705738	6.1427	0.480037	-2.48343	6.47883	3.5996e-13
ENSG00000204388	ENSMUSG00000091971	HSPA1B	Hspa1a	heat shock protein family A (Hsp70) member 1B [Source:HGNC Symbol;Acc:HGNC:5233]	-1.22075	6.36989	0.242519	2.98581	6.45992	3.69418e-13
ENSG00000204389	ENSMUSG00000091971	HSPA1A	Hspa1a	heat shock protein family A (Hsp70) member 1A [Source:HGNC Symbol;Acc:HGNC:5232]	-0.884212	6.30071	0.436214	2.98581	6.45992	3.69418e-13
ENSG00000182871	ENSMUSG00000001435	COL18A1	Col18a1	collagen type XVIII alpha 1 chain [Source:HGNC Symbol;Acc:HGNC:2195]	0.376688	7.05823	0.581929	1.42837	8.8317	4.93401e-13
ENSG00000142910	ENSMUSG00000028776	TINAGL1	Tinagl1	tubulointerstitial nephritis antigen like 1 [Source:HGNC Symbol;Acc:HGNC:19168]	1.03913	6.64345	0.0781345	1.4938	7.75975	5.23528e-13
ENSG00000131711	ENSMUSG00000052727	MAP1B	Map1b	microtubule associated protein 1B [Source:HGNC Symbol;Acc:HGNC:6836]	0.0132371	10.2074	0.991339	1.84312	9.39648	5.51466e-13
ENSG00000109472	ENSMUSG00000037852	CPE	Cpe	carboxypeptidase E [Source:HGNC Symbol;Acc:HGNC:2303]	-0.764509	6.90237	0.278902	1.83356	10.2534	7.61599e-13
ENSG00000139278	ENSMUSG00000056888	GLIPR1	Glipr1	GLI pathogenesis related 1 [Source:HGNC Symbol;Acc:HGNC:17001]	-1.13062	6.27308	0.0931001	-1.78885	6.95072	8.38267e-13
ENSG00000104447	ENSMUSG00000038679	TRPS1	Trps1	transcriptional repressor GATA binding 1 [Source:HGNC Symbol;Acc:HGNC:12340]	-0.173148	7.65716	0.851834	-1.51401	6.95091	1.61518e-12
ENSG00000120885	ENSMUSG00000022037	CLU	Clu	clusterin [Source:HGNC Symbol;Acc:HGNC:2095]	0.141385	6.30127	0.932439	-1.28199	9.97016	2.1774e-12
ENSG00000109861	ENSMUSG00000030560	CTSC	Ctsc	cathepsin C [Source:HGNC Symbol;Acc:HGNC:2528]	0.260994	8.22422	0.816483	-1.6461	8.73256	2.39429e-12
ENSG00000076706	ENSMUSG00000032135	MCAM	Mcam	melanoma cell adhesion molecule [Source:HGNC Symbol;Acc:HGNC:6934]	0.731589	7.926	0.245933	1.77299	8.7927	2.41459e-12
ENSG00000169116	ENSMUSG00000034981	PARM1	Parm1	prostate androgen-regulated mucin-like protein 1 [Source:HGNC Symbol;Acc:HGNC:24536]	0.624282	7.3547	0.409302	1.40505	7.1583	2.62948e-12
ENSG00000145012	ENSMUSG00000033306	LPP	Lpp	LIM domain containing preferred translocation partner in lipoma [Source:HGNC Symbol;Acc:HGNC:6679]	0.138877	11.301	0.875176	1.45447	10.4576	2.71777e-12
ENSG00000178104	ENSMUSG00000038170	PDE4DIP	Pde4dip	phosphodiesterase 4D interacting protein [Source:HGNC Symbol;Acc:HGNC:15580]	1.4324	10.5653	0.062867	1.62019	7.97699	3.29142e-12
ENSG00000198947	ENSMUSG00000045103	DMD	Dmd	dystrophin [Source:HGNC Symbol;Acc:HGNC:2928]	1.03734	9.35324	0.301652	2.02926	8.59348	4.07377e-12
ENSG00000137177	ENSMUSG00000021375	KIF13A	Kif13a	kinesin family member 13A [Source:HGNC Symbol;Acc:HGNC:14566]	0.115088	7.54048	0.921893	1.40185	7.09844	6.10462e-12
ENSG00000115594	ENSMUSG00000026072	IL1R1	Il1r1	interleukin 1 receptor type 1 [Source:HGNC Symbol;Acc:HGNC:5993]	0.288037	9.11014	0.751525	-1.64539	6.69184	9.55214e-12
ENSG00000166710	ENSMUSG00000060802	B2M	B2m	beta-2-microglobulin [Source:HGNC Symbol;Acc:HGNC:914]	-1.04211	11.1167	0.0784968	-1.44765	12.0263	1.00038e-11
ENSG00000159251	ENSMUSG00000068614	ACTC1	Actc1	actin alpha cardiac muscle 1 [Source:HGNC Symbol;Acc:HGNC:143]	1.16248	9.20376	0.48118	3.19183	7.63993	1.78755e-11
ENSG00000134986	ENSMUSG00000042834	NREP	Nrep	neuronal regeneration related protein [Source:HGNC Symbol;Acc:HGNC:16834]	-0.481817	7.1486	0.676124	1.32224	7.26128	1.92022e-11
ENSG00000128609	ENSMUSG00000023089	NDUFA5	Ndufa5	NADH:ubiquinone oxidoreductase subunit A5 [Source:HGNC Symbol;Acc:HGNC:7688]	0.687537	7.27515	0.241879	1.24583	7.80127	1.97499e-11
ENSG00000151726	ENSMUSG00000018796	ACSL1	Acsl1	acyl-CoA synthetase long chain family member 1 [Source:HGNC Symbol;Acc:HGNC:3569]	1.07803	9.35501	0.143092	1.77271	7.43861	2.06931e-11
ENSG00000168610	ENSMUSG00000004040	STAT3	Stat3	signal transducer and activator of transcription 3 [Source:HGNC Symbol;Acc:HGNC:11364]	0.909623	9.04575	0.104452	-1.18351	8.49025	2.40414e-11
ENSG00000138640	ENSMUSG00000037709	FAM13A	Fam13a	family with sequence similarity 13 member A [Source:HGNC Symbol;Acc:HGNC:19367]	-0.615848	6.72887	0.392804	3.51738	6.15912	2.69032e-11
ENSG00000067900	ENSMUSG00000024290	ROCK1	Rock1	Rho associated coiled-coil containing protein kinase 1 [Source:HGNC Symbol;Acc:HGNC:10251]	-0.5946	9.02582	0.288983	1.47006	9.83184	3.05507e-11
ENSG00000028137	ENSMUSG00000028599	TNFRSF1B	Tnfrsf1b	TNF receptor superfamily member 1B [Source:HGNC Symbol;Acc:HGNC:11917]	-0.691231	6.47741	0.490075	-3.10189	6.11743	3.12171e-11
ENSG00000130402	ENSMUSG00000054808	ACTN4	Actn4	actinin alpha 4 [Source:HGNC Symbol;Acc:HGNC:166]	0.800007	7.50883	0.163659	1.47534	9.8453	3.21415e-11
ENSG00000050165	ENSMUSG00000030772	DKK3	Dkk3	dickkopf WNT signaling pathway inhibitor 3 [Source:HGNC Symbol;Acc:HGNC:2893]	-0.05287	7.82423	0.979889	1.17948	7.90676	3.46411e-11
ENSG00000166033	ENSMUSG00000006205	HTRA1	Htra1	HtrA serine peptidase 1 [Source:HGNC Symbol;Acc:HGNC:9476]	-1.1496	6.0741	0.129398	1.19788	7.8977	3.50885e-11
ENSG00000162458	ENSMUSG00000006219	FBLIM1	Fblim1	filamin binding LIM protein 1 [Source:HGNC Symbol;Acc:HGNC:24686]	0.0134721	6.47775	0.993084	1.70895	9.65676	3.62846e-11
ENSG00000182326	ENSMUSG00000038521	C1S	C1s1	complement C1s [Source:HGNC Symbol;Acc:HGNC:1247]	-0.135031	8.33492	0.906188	-1.26562	7.86254	3.87657e-11
ENSG00000107796	ENSMUSG00000035783	ACTA2	Acta2	actin alpha 2, smooth muscle [Source:HGNC Symbol;Acc:HGNC:130]	-0.906928	7.6203	0.210367	1.66001	12.4429	4.85921e-11
ENSG00000035403	ENSMUSG00000021823	VCL	Vcl	vinculin [Source:HGNC Symbol;Acc:HGNC:12665]	0.716767	9.18431	0.24754	1.16978	8.38959	4.89913e-11
ENSG00000189067	ENSMUSG00000022500	LITAF	Litaf	lipopolysaccharide induced TNF factor [Source:HGNC Symbol;Acc:HGNC:16841]	-0.566581	7.33935	0.365015	-1.91253	6.62778	5.47269e-11
ENSG00000189043	ENSMUSG00000029632	NDUFA4	Ndufa4	NDUFA4 mitochondrial complex associated [Source:HGNC Symbol;Acc:HGNC:7687]	1.45582	6.6102	0.0601639	1.3066	7.23553	5.92616e-11
ENSG00000135218	ENSMUSG00000002944	CD36	Cd36	CD36 molecule [Source:HGNC Symbol;Acc:HGNC:1663]	0.222995	10.0282	0.844144	2.26398	7.6967	6.60175e-11
ENSG00000128791	ENSMUSG00000024098	TWSG1	Twsg1	twisted gastrulation BMP signaling modulator 1 [Source:HGNC Symbol;Acc:HGNC:12429]	-0.211836	6.80097	0.816483	1.21095	7.23865	8.02372e-11
ENSG00000107104	ENSMUSG00000032702	KANK1	Kank1	KN motif and ankyrin repeat domains 1 [Source:HGNC Symbol;Acc:HGNC:19309]	1.07852	7.53499	0.147618	1.29669	8.54958	8.08144e-11
ENSG00000198363	ENSMUSG00000028207	ASPH	Asph	aspartate beta-hydroxylase [Source:HGNC Symbol;Acc:HGNC:757]	0.284254	8.75867	0.711722	1.0494	8.09732	8.20532e-11
ENSG00000139318	ENSMUSG00000019960	DUSP6	Dusp6	dual specificity phosphatase 6 [Source:HGNC Symbol;Acc:HGNC:3072]	0.150443	6.7228	0.871566	-2.09121	6.45234	8.22793e-11
ENSG00000163171	ENSMUSG00000036533	CDC42EP3	Cdc42ep3	CDC42 effector protein 3 [Source:HGNC Symbol;Acc:HGNC:16943]	0.570239	7.38062	0.366584	1.80838	6.91539	9.02471e-11
ENSG00000168743	ENSMUSG00000040998	NPNT	Npnt	nephronectin [Source:HGNC Symbol;Acc:HGNC:27405]	1.67911	6.45929	0.0586541	2.0212	9.84773	1.12194e-10
ENSG00000100906	ENSMUSG00000021025	NFKBIA	Nfkbia	NFKB inhibitor alpha [Source:HGNC Symbol;Acc:HGNC:7797]	0.301807	6.7449	0.72511	-1.32133	9.68108	1.14298e-10
ENSG00000153071	ENSMUSG00000022150	DAB2	Dab2	DAB adaptor protein 2 [Source:HGNC Symbol;Acc:HGNC:2662]	-0.781387	8.26824	0.261262	-1.18774	7.73779	1.48009e-10
ENSG00000155744	ENSMUSG00000038174	FAM126B	Fam126b	hyccin PI4KA lipid kinase complex subunit 2 [Source:HGNC Symbol;Acc:HGNC:28593]	-0.519447	6.33663	0.459494	1.57393	7.09966	1.56873e-10
ENSG00000079308	ENSMUSG00000055322	TNS1	Tns1	tensin 1 [Source:HGNC Symbol;Acc:HGNC:11973]	0.986761	10.3971	0.0774504	1.76059	10.6483	1.80959e-10
ENSG00000133026	ENSMUSG00000020900	MYH10	Myh10	myosin heavy chain 10 [Source:HGNC Symbol;Acc:HGNC:7568]	-1.24274	8.75932	0.114514	1.66803	7.94611	1.83869e-10
ENSG00000102024	ENSMUSG00000016382	PLS3	Pls3	plastin 3 [Source:HGNC Symbol;Acc:HGNC:9091]	-0.840709	8.39221	0.242109	1.31439	9.94835	1.89378e-10
ENSG00000168386	ENSMUSG00000043336	FILIP1L	Filip1l	filamin A interacting protein 1 like [Source:HGNC Symbol;Acc:HGNC:24589]	-0.998268	8.29791	0.0604484	1.57754	7.88703	1.94326e-10
ENSG00000180447	ENSMUSG00000052957	GAS1	Gas1	growth arrest specific 1 [Source:HGNC Symbol;Acc:HGNC:4165]	-1.06547	5.82085	0.150037	1.17211	7.9596	2.45763e-10
ENSG00000072110	ENSMUSG00000015143	ACTN1	Actn1	actinin alpha 1 [Source:HGNC Symbol;Acc:HGNC:163]	0.157119	8.56315	0.865807	1.19936	10.0846	2.70201e-10
ENSG00000163520	ENSMUSG00000064080	FBLN2	Fbln2	fibulin 2 [Source:HGNC Symbol;Acc:HGNC:3601]	-0.260069	7.30764	0.865984	-1.45098	6.74205	2.80761e-10
ENSG00000110092	ENSMUSG00000070348	CCND1	Ccnd1	cyclin D1 [Source:HGNC Symbol;Acc:HGNC:1582]	0.105893	6.92059	0.945192	-1.21564	7.25723	2.8425e-10
ENSG00000084234	ENSMUSG00000031996	APLP2	Aplp2	amyloid beta precursor like protein 2 [Source:HGNC Symbol;Acc:HGNC:598]	0.181068	8.8175	0.839899	1.28706	8.95159	3.41437e-10
ENSG00000143248	ENSMUSG00000026678	RGS5	Rgs5	regulator of G protein signaling 5 [Source:HGNC Symbol;Acc:HGNC:10001]	-0.661073	10.5183	0.457378	1.47898	12.0556	3.45126e-10
ENSG00000184588	ENSMUSG00000028525	PDE4B	Pde4b	phosphodiesterase 4B [Source:HGNC Symbol;Acc:HGNC:8781]	0.0114462	7.13554	0.994498	-1.23252	7.5523	3.65085e-10
ENSG00000134243	ENSMUSG00000068747	SORT1	Sort1	sortilin 1 [Source:HGNC Symbol;Acc:HGNC:11186]	0.34411	8.36178	0.650802	1.63201	6.57247	4.15698e-10
ENSG00000174099	ENSMUSG00000051236	MSRB3	Msrb3	methionine sulfoxide reductase B3 [Source:HGNC Symbol;Acc:HGNC:27375]	0.303874	7.64792	0.701468	1.27481	8.14666	5.38627e-10
ENSG00000198467	ENSMUSG00000028464	TPM2	Tpm2	tropomyosin 2 [Source:HGNC Symbol;Acc:HGNC:12011]	0.817637	7.38789	0.281641	2.03036	10.5509	6.38558e-10
ENSG00000173402	ENSMUSG00000039952	DAG1	Dag1	dystroglycan 1 [Source:HGNC Symbol;Acc:HGNC:2666]	0.903494	6.75153	0.14481	1.00276	8.30736	7.84549e-10
ENSG00000150995	ENSMUSG00000030102	ITPR1	Itpr1	inositol 1,4,5-trisphosphate receptor type 1 [Source:HGNC Symbol;Acc:HGNC:6180]	-0.415593	7.67928	0.507138	1.14634	7.47061	8.04854e-10
ENSG00000131791	ENSMUSG00000038205	PRKAB2	Prkab2	protein kinase AMP-activated non-catalytic subunit beta 2 [Source:HGNC Symbol;Acc:HGNC:9379]	-0.343471	6.44707	0.689693	1.46629	6.76707	8.25184e-10
ENSG00000108679	ENSMUSG00000033880	LGALS3BP	Lgals3bp	galectin 3 binding protein [Source:HGNC Symbol;Acc:HGNC:6564]	0.352638	6.28264	0.778414	-2.09718	6.84413	8.92522e-10
ENSG00000172216	ENSMUSG00000056501	CEBPB	Cebpb	CCAAT enhancer binding protein beta [Source:HGNC Symbol;Acc:HGNC:1834]	0.150251	6.13779	0.922521	-1.31921	7.33786	1.2973e-09
ENSG00000173905	ENSMUSG00000034109	GOLIM4	Golim4	golgi integral membrane protein 4 [Source:HGNC Symbol;Acc:HGNC:15448]	0.557205	8.01177	0.342219	1.12721	8.12063	1.33948e-09
ENSG00000131378	ENSMUSG00000039316	RFTN1	Rftn1	raftlin, lipid raft linker 1 [Source:HGNC Symbol;Acc:HGNC:30278]	-0.164915	6.37901	0.860786	-1.5485	6.45557	1.40863e-09
ENSG00000153179	ENSMUSG00000025795	RASSF3	Rassf3	Ras association domain family member 3 [Source:HGNC Symbol;Acc:HGNC:14271]	-0.471539	7.38982	0.497701	1.20139	7.65915	1.48913e-09
ENSG00000198763	ENSMUSG00000064345	ND2	mt-Nd2	mitochondrially encoded NADH:ubiquinone oxidoreductase core subunit 2 [Source:HGNC Symbol;Acc:HGNC:7456]	-0.0232392	10.9681	0.991339	1.47695	13.4746	1.54443e-09
ENSG00000119655	ENSMUSG00000021242	NPC2	Npc2	NPC intracellular cholesterol transporter 2 [Source:HGNC Symbol;Acc:HGNC:14537]	-0.360106	5.98491	0.735742	-1.27697	9.35378	1.55921e-09
ENSG00000143549	ENSMUSG00000027940	TPM3	Tpm3	tropomyosin 3 [Source:HGNC Symbol;Acc:HGNC:12012]	-0.551262	8.0939	0.297556	-1.23434	7.12365	1.76074e-09
ENSG00000058272	ENSMUSG00000019907	PPP1R12A	Ppp1r12a	protein phosphatase 1 regulatory subunit 12A [Source:HGNC Symbol;Acc:HGNC:7618]	-0.419838	8.84625	0.449617	1.41172	9.09741	1.76074e-09
ENSG00000147027	ENSMUSG00000025666	TMEM47	Tmem47	transmembrane protein 47 [Source:HGNC Symbol;Acc:HGNC:18515]	-0.527308	7.54397	0.409302	1.48705	7.45583	1.87895e-09
ENSG00000113083	ENSMUSG00000024529	LOX	Lox	lysyl oxidase [Source:HGNC Symbol;Acc:HGNC:6664]	-1.32548	8.6754	0.102028	-1.30886	10.3753	1.88744e-09
ENSG00000221869	ENSMUSG00000071637	CEBPD	Cebpd	CCAAT enhancer binding protein delta [Source:HGNC Symbol;Acc:HGNC:1835]	0.639254	7.69464	0.356939	-1.52274	6.97481	2.1188e-09
ENSG00000069667	ENSMUSG00000032238	RORA	Rora	RAR related orphan receptor A [Source:HGNC Symbol;Acc:HGNC:10258]	-0.084258	8.3487	0.929362	1.01526	7.78495	2.54813e-09
ENSG00000168028	ENSMUSG00000032518	RPSA	Rpsa	ribosomal protein SA [Source:HGNC Symbol;Acc:HGNC:6502]	0.516395	7.26645	0.329324	-1.03632	7.77291	2.80723e-09
ENSG00000151914	ENSMUSG00000026131	DST	Dst	dystonin [Source:HGNC Symbol;Acc:HGNC:1090]	0.449441	11.3828	0.543905	1.39865	9.08785	2.83795e-09
ENSG00000149591	ENSMUSG00000032085	TAGLN	Tagln	transgelin [Source:HGNC Symbol;Acc:HGNC:11553]	-0.0250233	7.82946	0.988891	2.11547	8.71858	2.86848e-09
ENSG00000162804	ENSMUSG00000047793	SNED1	Sned1	sushi, nidogen and EGF like domains 1 [Source:HGNC Symbol;Acc:HGNC:24696]	0.576242	6.61864	0.471657	-1.35127	6.53326	3.95733e-09
ENSG00000027697	ENSMUSG00000020009	IFNGR1	Ifngr1	interferon gamma receptor 1 [Source:HGNC Symbol;Acc:HGNC:5439]	-0.358951	7.60626	0.57956	-1.03232	7.8668	4.7641e-09
ENSG00000162688	ENSMUSG00000033400	AGL	Agl	amylo-alpha-1, 6-glucosidase, 4-alpha-glucanotransferase [Source:HGNC Symbol;Acc:HGNC:321]	0.544875	6.72663	0.387712	1.49713	6.46806	4.87893e-09
ENSG00000152818	ENSMUSG00000019820	UTRN	Utrn	utrophin [Source:HGNC Symbol;Acc:HGNC:12635]	-0.105918	9.8114	0.909242	1.14896	8.48355	5.08871e-09
ENSG00000119138	ENSMUSG00000033863	KLF9	Klf9	KLF transcription factor 9 [Source:HGNC Symbol;Acc:HGNC:1123]	0.623168	9.20113	0.298427	1.17723	8.98108	5.27284e-09
ENSG00000091136	ENSMUSG00000002900	LAMB1	Lamb1	laminin subunit beta 1 [Source:HGNC Symbol;Acc:HGNC:6486]	0.253601	9.43705	0.746097	-1.40019	7.10955	5.41254e-09
ENSG00000159403	ENSMUSG00000055172	C1R	C1ra	complement C1r [Source:HGNC Symbol;Acc:HGNC:1246]	0.350245	7.74321	0.689693	-1.35432	8.2673	5.81544e-09
ENSG00000168079	ENSMUSG00000022032	SCARA5	Scara5	scavenger receptor class A member 5 [Source:HGNC Symbol;Acc:HGNC:28701]	0.743135	6.06575	0.618435	1.6073	7.34398	6.2197e-09
ENSG00000196924	ENSMUSG00000031328	FLNA	Flna	filamin A [Source:HGNC Symbol;Acc:HGNC:3754]	0.275992	10.3927	0.757693	1.44056	10.7261	7.27223e-09
ENSG00000096968	ENSMUSG00000024789	JAK2	Jak2	Janus kinase 2 [Source:HGNC Symbol;Acc:HGNC:6192]	-0.615498	7.32452	0.228317	-1.48746	6.54521	7.30134e-09
ENSG00000198961	ENSMUSG00000024083	PJA2	Pja2	praja ring finger ubiquitin ligase 2 [Source:HGNC Symbol;Acc:HGNC:17481]	-0.24482	9.22954	0.722599	1.02077	7.39024	7.91873e-09
ENSG00000089159	ENSMUSG00000029528	PXN	Pxn	paxillin [Source:HGNC Symbol;Acc:HGNC:9718]	0.843425	6.39961	0.204364	-1.38806	6.42377	8.28275e-09
ENSG00000073712	ENSMUSG00000037712	FERMT2	Fermt2	FERM domain containing kindlin 2 [Source:HGNC Symbol;Acc:HGNC:15767]	0.403057	8.41344	0.454846	1.02624	8.36288	8.30535e-09
ENSG00000071054	ENSMUSG00000026074	MAP4K4	Map4k4	mitogen-activated protein kinase kinase kinase kinase 4 [Source:HGNC Symbol;Acc:HGNC:6866]	0.445019	8.07169	0.397377	-1.07075	9.00476	9.81294e-09
ENSG00000170889	ENSMUSG00000006333	RPS9	Rps9	ribosomal protein S9 [Source:HGNC Symbol;Acc:HGNC:10442]	1.01595	7.10863	0.120465	-1.15651	9.91871	1.16108e-08
ENSG00000142089	ENSMUSG00000025492	IFITM3	Ifitm3	interferon induced transmembrane protein 3 [Source:HGNC Symbol;Acc:HGNC:5414]	0.58138	6.58701	0.469407	-1.60721	9.26259	1.21178e-08
ENSG00000149294	ENSMUSG00000039542	NCAM1	Ncam1	neural cell adhesion molecule 1 [Source:HGNC Symbol;Acc:HGNC:7656]	1.53467	7.32055	0.172098	1.28309	9.67276	1.44338e-08
ENSG00000181722	ENSMUSG00000022708	ZBTB20	Zbtb20	zinc finger and BTB domain containing 20 [Source:HGNC Symbol;Acc:HGNC:13503]	0.081489	7.05764	0.933701	1.20176	11.0496	1.71225e-08
ENSG00000125868	ENSMUSG00000015932	DSTN	Dstn	destrin, actin depolymerizing factor [Source:HGNC Symbol;Acc:HGNC:15750]	0.0414651	9.11748	0.972988	2.09459	8.63769	1.77181e-08
ENSG00000140740	ENSMUSG00000030884	UQCRC2	Uqcrc2	ubiquinol-cytochrome c reductase core protein 2 [Source:HGNC Symbol;Acc:HGNC:12586]	0.980491	7.49045	0.0465972	1.06664	7.54944	1.862e-08
ENSG00000124831	ENSMUSG00000026305	LRRFIP1	Lrrfip1	LRR binding FLII interacting protein 1 [Source:HGNC Symbol;Acc:HGNC:6702]	0.0608879	9.45682	0.952594	1.16041	8.25719	1.95802e-08
ENSG00000107798	ENSMUSG00000024781	LIPA	Lipa	lipase A, lysosomal acid type [Source:HGNC Symbol;Acc:HGNC:6617]	-0.813501	6.84035	0.289542	-1.25371	6.4673	2.04432e-08
ENSG00000174804	ENSMUSG00000049791	FZD4	Fzd4	frizzled class receptor 4 [Source:HGNC Symbol;Acc:HGNC:4042]	0.485019	8.13046	0.507358	1.19742	7.4833	2.13044e-08
ENSG00000125810	ENSMUSG00000027435	CD93	Cd93	CD93 molecule [Source:HGNC Symbol;Acc:HGNC:15855]	-0.141872	8.82126	0.885292	-1.18368	8.07621	2.27782e-08
ENSG00000109099	ENSMUSG00000018217	PMP22	Pmp22	peripheral myelin protein 22 [Source:HGNC Symbol;Acc:HGNC:9118]	0.20302	7.82604	0.825168	1.04709	8.45529	2.29327e-08
ENSG00000087086	ENSMUSG00000050708	FTL	Ftl1	ferritin light chain [Source:HGNC Symbol;Acc:HGNC:3999]	0.00014508	9.52772	0.999797	-1.25234	7.826	2.57561e-08
ENSG00000165795	ENSMUSG00000004558	NDRG2	Ndrg2	NDRG family member 2 [Source:HGNC Symbol;Acc:HGNC:14460]	1.26623	6.11536	0.173616	1.4473	7.71958	3.10308e-08
ENSG00000134352	ENSMUSG00000021756	IL6ST	Il6st	interleukin 6 cytokine family signal transducer [Source:HGNC Symbol;Acc:HGNC:6021]	0.0138107	11.098	0.991339	-1.16772	9.31694	4.00342e-08
ENSG00000124177	ENSMUSG00000057133	CHD6	Chd6	chromodomain helicase DNA binding protein 6 [Source:HGNC Symbol;Acc:HGNC:19057]	-0.147406	7.28398	0.839307	1.13975	7.32966	4.16965e-08
ENSG00000187479	ENSMUSG00000087006	C11orf96	Gm13889	chromosome 11 open reading frame 96 [Source:HGNC Symbol;Acc:HGNC:38675]	1.22446	5.9103	0.162106	1.20804	8.16853	4.22513e-08
ENSG00000170323	ENSMUSG00000062515	FABP4	Fabp4	fatty acid binding protein 4 [Source:HGNC Symbol;Acc:HGNC:3559]	-0.0457603	8.80778	0.986229	1.81311	10.2733	4.70257e-08
ENSG00000050405	ENSMUSG00000023022	LIMA1	Lima1	LIM domain and actin binding 1 [Source:HGNC Symbol;Acc:HGNC:24636]	-0.873911	7.74338	0.0893513	-1.03489	7.8623	4.92854e-08
ENSG00000141753	ENSMUSG00000017493	IGFBP4	Igfbp4	insulin like growth factor binding protein 4 [Source:HGNC Symbol;Acc:HGNC:5473]	1.04376	8.85496	0.145085	-1.2821	10.8199	5.46803e-08
ENSG00000173848	ENSMUSG00000021215	NET1	Net1	neuroepithelial cell transforming 1 [Source:HGNC Symbol;Acc:HGNC:14592]	-0.988596	6.26768	0.13868	2.21797	7.02423	6.28411e-08
ENSG00000113721	ENSMUSG00000024620	PDGFRB	Pdgfrb	platelet derived growth factor receptor beta [Source:HGNC Symbol;Acc:HGNC:8804]	0.443052	8.40972	0.434103	-1.01845	8.37503	6.3167e-08
ENSG00000156804	ENSMUSG00000022358	FBXO32	Fbxo32	F-box protein 32 [Source:HGNC Symbol;Acc:HGNC:16731]	-0.320631	8.32274	0.816483	1.24616	7.22468	7.27428e-08
ENSG00000197256	ENSMUSG00000032194	KANK2	Kank2	KN motif and ankyrin repeat domains 2 [Source:HGNC Symbol;Acc:HGNC:29300]	1.11781	7.83175	0.0586541	1.00787	7.69231	7.79154e-08
ENSG00000213281	ENSMUSG00000027852	NRAS	Nras	NRAS proto-oncogene, GTPase [Source:HGNC Symbol;Acc:HGNC:7989]	-0.4045	6.8803	0.544308	-1.03679	7.09207	8.04831e-08
ENSG00000005249	ENSMUSG00000002997	PRKAR2B	Prkar2b	protein kinase cAMP-dependent type II regulatory subunit beta [Source:HGNC Symbol;Acc:HGNC:9392]	1.26743	7.61783	0.278902	2.50732	6.43363	8.1001e-08
ENSG00000075426	ENSMUSG00000029135	FOSL2	Fosl2	FOS like 2, AP-1 transcription factor subunit [Source:HGNC Symbol;Acc:HGNC:3798]	0.737716	8.98271	0.289641	-1.05455	7.30138	8.35714e-08
ENSG00000130414	ENSMUSG00000026260	NDUFA10	Ndufa10	NADH:ubiquinone oxidoreductase subunit A10 [Source:HGNC Symbol;Acc:HGNC:7684]	0.684762	7.14203	0.177918	1.27561	7.30643	1.01282e-07
ENSG00000198727	ENSMUSG00000064370	CYTB	mt-Cytb	mitochondrially encoded cytochrome b [Source:HGNC Symbol;Acc:HGNC:7427]	-0.00849081	11.397	0.996091	1.10059	13.9595	1.01282e-07
ENSG00000112769	ENSMUSG00000019846	LAMA4	Lama4	laminin subunit alpha 4 [Source:HGNC Symbol;Acc:HGNC:6484]	-0.34439	8.29536	0.625327	1.14616	7.16407	1.29368e-07
ENSG00000166224	ENSMUSG00000020097	SGPL1	Sgpl1	sphingosine-1-phosphate lyase 1 [Source:HGNC Symbol;Acc:HGNC:10817]	-0.814289	6.20716	0.18692	-1.16014	7.19312	1.59156e-07
ENSG00000127314	ENSMUSG00000052681	RAP1B	Rap1b	RAP1B, member of RAS oncogene family [Source:HGNC Symbol;Acc:HGNC:9857]	-0.778201	8.17471	0.14152	-1.00223	8.62615	1.89064e-07
ENSG00000135272	ENSMUSG00000041390	MDFIC	Mdfic	MyoD family inhibitor domain containing [Source:HGNC Symbol;Acc:HGNC:28870]	-0.692159	7.17885	0.262545	-1.11692	6.85899	1.89064e-07
ENSG00000213639	ENSMUSG00000014956	PPP1CB	Ppp1cb	protein phosphatase 1 catalytic subunit beta [Source:HGNC Symbol;Acc:HGNC:9282]	-0.153659	9.98434	0.8666	1.16472	8.62704	1.93113e-07
ENSG00000172037	ENSMUSG00000052911	LAMB2	Lamb2	laminin subunit beta 2 [Source:HGNC Symbol;Acc:HGNC:6487]	0.864	7.90403	0.232614	1.05094	8.70061	1.97593e-07
ENSG00000128245	ENSMUSG00000018965	YWHAH	Ywhah	tyrosine 3-monooxygenase/tryptophan 5-monooxygenase activation protein eta [Source:HGNC Symbol;Acc:HGNC:12853]	-0.673066	6.93638	0.223956	-1.15336	7.37636	2.14908e-07
ENSG00000122786	ENSMUSG00000029761	CALD1	Cald1	caldesmon 1 [Source:HGNC Symbol;Acc:HGNC:1441]	-0.479605	10.7757	0.454846	1.12997	11.4014	2.31816e-07
ENSG00000241644	ENSMUSG00000003477	INMT	Inmt	indolethylamine N-methyltransferase [Source:HGNC Symbol;Acc:HGNC:6069]	0.600984	5.98641	0.631532	2.45987	6.03886	2.38996e-07
ENSG00000198804	ENSMUSG00000064351	COX1	mt-Co1	mitochondrially encoded cytochrome c oxidase I [Source:HGNC Symbol;Acc:HGNC:7419]	0.0342435	12.3475	0.981394	1.10544	10.313	2.69808e-07
ENSG00000089006	ENSMUSG00000027423	SNX5	Snx5	sorting nexin 5 [Source:HGNC Symbol;Acc:HGNC:14969]	-0.068099	6.88709	0.939631	-1.15017	7.53963	2.80134e-07
ENSG00000087460	ENSMUSG00000027523	GNAS	Gnas	GNAS complex locus [Source:HGNC Symbol;Acc:HGNC:4392]	0.360294	9.4288	0.597124	1.01502	9.68534	3.32982e-07
ENSG00000049323	ENSMUSG00000001870	LTBP1	Ltbp1	latent transforming growth factor beta binding protein 1 [Source:HGNC Symbol;Acc:HGNC:6714]	-0.554695	8.86578	0.639738	1.32369	9.03341	3.5366e-07
ENSG00000100154	ENSMUSG00000033209	TTC28	Ttc28	tetratricopeptide repeat domain 28 [Source:HGNC Symbol;Acc:HGNC:29179]	0.233111	6.68163	0.737747	1.15247	8.41008	4.18582e-07
ENSG00000163820	ENSMUSG00000025241	FYCO1	Fyco1	FYVE and coiled-coil domain autophagy adaptor 1 [Source:HGNC Symbol;Acc:HGNC:14673]	1.03513	7.31058	0.149288	1.11855	6.82098	4.37514e-07
ENSG00000087245	ENSMUSG00000031740	MMP2	Mmp2	matrix metallopeptidase 2 [Source:HGNC Symbol;Acc:HGNC:7166]	0.128802	8.10587	0.897517	-1.20019	8.08427	4.47e-07
ENSG00000134531	ENSMUSG00000030208	EMP1	Emp1	epithelial membrane protein 1 [Source:HGNC Symbol;Acc:HGNC:3333]	0.524982	8.90161	0.451655	-1.17142	7.71762	4.84279e-07
ENSG00000198786	ENSMUSG00000064367	ND5	mt-Nd5	mitochondrially encoded NADH:ubiquinone oxidoreductase core subunit 5 [Source:HGNC Symbol;Acc:HGNC:7461]	-0.019086	12.0435	0.991339	1.11024	10.8516	6.65995e-07
ENSG00000104341	ENSMUSG00000022257	LAPTM4B	Laptm4b	lysosomal protein transmembrane 4 beta [Source:HGNC Symbol;Acc:HGNC:13646]	0.783717	6.91678	0.3511	1.07251	6.58512	7.73824e-07
ENSG00000112893	ENSMUSG00000024085	MAN2A1	Man2a1	mannosidase alpha class 2A member 1 [Source:HGNC Symbol;Acc:HGNC:6824]	-0.913497	7.52677	0.02765	-1.08134	7.27378	1.0252e-06
ENSG00000115738	ENSMUSG00000020644	ID2	Id2	inhibitor of DNA binding 2 [Source:HGNC Symbol;Acc:HGNC:5361]	-0.201136	6.51252	0.865984	1.13105	8.91854	1.24445e-06
ENSG00000152583	ENSMUSG00000029309	SPARCL1	Sparcl1	SPARC like 1 [Source:HGNC Symbol;Acc:HGNC:11220]	0.641687	10.2415	0.347026	1.12763	9.88536	1.25616e-06
ENSG00000020577	ENSMUSG00000021838	SAMD4A	Samd4	sterile alpha motif domain containing 4A [Source:HGNC Symbol;Acc:HGNC:23023]	1.0635	7.98457	0.0727377	1.33787	9.26995	1.47569e-06
ENSG00000179776	ENSMUSG00000031871	CDH5	Cdh5	cadherin 5 [Source:HGNC Symbol;Acc:HGNC:1764]	0.778292	6.97974	0.182071	-1.45405	6.34023	1.83947e-06
ENSG00000145730	ENSMUSG00000026335	PAM	Pam	peptidylglycine alpha-amidating monooxygenase [Source:HGNC Symbol;Acc:HGNC:8596]	0.556563	9.61545	0.594687	1.07801	9.3399	2.06965e-06
ENSG00000121691	ENSMUSG00000027187	CAT	Cat	catalase [Source:HGNC Symbol;Acc:HGNC:1516]	0.0525277	6.52926	0.967752	1.0343	6.97886	2.19415e-06
ENSG00000086062	ENSMUSG00000028413	B4GALT1	B4galt1	beta-1,4-galactosyltransferase 1 [Source:HGNC Symbol;Acc:HGNC:924]	-0.119155	8.01432	0.88821	-1.11455	8.50564	2.35611e-06
ENSG00000085063	ENSMUSG00000032679	CD59	Cd59a	CD59 molecule (CD59 blood group) [Source:HGNC Symbol;Acc:HGNC:1689]	0.828638	8.29339	0.0859631	1.09272	6.82757	2.64563e-06
ENSG00000171033	ENSMUSG00000027499	PKIA	Pkia	cAMP-dependent protein kinase inhibitor alpha [Source:HGNC Symbol;Acc:HGNC:9017]	1.48121	6.48721	0.143671	1.23773	6.99608	4.12984e-06
ENSG00000117525	ENSMUSG00000028128	F3	F3	coagulation factor III, tissue factor [Source:HGNC Symbol;Acc:HGNC:3541]	0.00659805	6.19028	0.996922	2.24789	7.53881	4.13711e-06
ENSG00000198125	ENSMUSG00000018893	MB	Mb	myoglobin [Source:HGNC Symbol;Acc:HGNC:6915]	1.9883	8.58961	0.242503	2.77064	7.24835	4.44849e-06
ENSG00000092841	ENSMUSG00000090841	MYL6	Myl6	myosin light chain 6 [Source:HGNC Symbol;Acc:HGNC:7587]	0.28055	7.97565	0.720785	1.22589	9.79126	4.58518e-06
ENSG00000163092	ENSMUSG00000027022	XIRP2	Xirp2	xin actin binding repeat containing 2 [Source:HGNC Symbol;Acc:HGNC:14303]	2.67752	10.0885	0.126529	2.72834	6.7145	4.93016e-06
ENSG00000186439	ENSMUSG00000019787	TRDN	Trdn	triadin [Source:HGNC Symbol;Acc:HGNC:12261]	1.42188	7.00683	0.353902	2.72456	7.13856	6.22751e-06
ENSG00000143632	ENSMUSG00000031972	ACTA1	Acta1	actin alpha 1, skeletal muscle [Source:HGNC Symbol;Acc:HGNC:129]	2.55284	8.35766	0.130116	2.50962	10.62	7.42665e-06
ENSG00000198932	ENSMUSG00000043384	GPRASP1	Gprasp1	G protein-coupled receptor associated sorting protein 1 [Source:HGNC Symbol;Acc:HGNC:24834]	0.196865	5.9843	0.88025	1.10807	7.05057	8.28309e-06
ENSG00000168497	ENSMUSG00000045954	SDPR	Cavin2	caveolae associated protein 2 [Source:HGNC Symbol;Acc:HGNC:10690]	-0.115805	7.75343	0.927501	1.14863	8.26805	1.01984e-05
ENSG00000110237	ENSMUSG00000032875	ARHGEF17	Arhgef17	Rho guanine nucleotide exchange factor 17 [Source:HGNC Symbol;Acc:HGNC:21726]	0.776779	7.03284	0.171231	1.00431	6.84075	1.46588e-05
ENSG00000134686	ENSMUSG00000028796	PHC2	Phc2	polyhomeotic homolog 2 [Source:HGNC Symbol;Acc:HGNC:3183]	0.916966	7.20567	0.0893513	-1.15363	6.72998	1.46626e-05
ENSG00000197535	ENSMUSG00000034593	MYO5A	Myo5a	myosin VA [Source:HGNC Symbol;Acc:HGNC:7602]	-0.576362	7.21907	0.366584	-1.13365	6.66266	2.4779e-05
ENSG00000115461	ENSMUSG00000026185	IGFBP5	Igfbp5	insulin like growth factor binding protein 5 [Source:HGNC Symbol;Acc:HGNC:5474]	-0.102981	10.4141	0.925867	1.13134	9.28171	3.20871e-05
ENSG00000100647	ENSMUSG00000021133	KIAA0247	Susd6	sushi domain containing 6 [Source:HGNC Symbol;Acc:HGNC:19956]	-0.511248	6.62896	0.372932	-1.18765	6.32176	6.85905e-05
ENSG00000154556	ENSMUSG00000031626	SORBS2	Sorbs2	sorbin and SH3 domain containing 2 [Source:HGNC Symbol;Acc:HGNC:24098]	1.24901	9.73805	0.356686	1.14725	6.9976	0.000100184
ENSG00000166963	ENSMUSG00000027254	MAP1A	Map1a	microtubule associated protein 1A [Source:HGNC Symbol;Acc:HGNC:6835]	-0.731339	6.4331	0.288507	1.20999	6.83813	0.000118463
ENSG00000066027	ENSMUSG00000026626	PPP2R5A	Ppp2r5a	protein phosphatase 2 regulatory subunit B'alpha [Source:HGNC Symbol;Acc:HGNC:9309]	0.397703	7.23135	0.450739	1.12856	7.20029	0.00012964
ENSG00000181092	ENSMUSG00000022878	ADIPOQ	Adipoq	adiponectin, C1Q and collagen domain containing [Source:HGNC Symbol;Acc:HGNC:13633]	2.0271	7.48474	0.248803	1.68455	7.97094	0.00028779
ENSG00000128016	ENSMUSG00000044786	ZFP36	Zfp36	ZFP36 ring finger protein [Source:HGNC Symbol;Acc:HGNC:12862]	-0.430331	7.66335	0.604129	-1.05769	6.8574	0.000321326
ENSG00000155657	ENSMUSG00000051747	TTN	Ttn	titin [Source:HGNC Symbol;Acc:HGNC:12403]	0.862279	13.3742	0.355169	2.54186	9.84172	0.000386698
ENSG00000133800	ENSMUSG00000030787	LYVE1	Lyve1	lymphatic vessel endothelial hyaluronan receptor 1 [Source:HGNC Symbol;Acc:HGNC:14687]	0.514647	7.32709	0.660165	1.08265	6.12891	0.00107657
